# Supplementary material for: Fetal Growth and Prenatal Exposure to Bisphenol A: The Generation R Study
Source: PubMed Central journal article supplement (PMC3621207; doi:10.1289/ehp.1205296), 2013-01-03
Supplement: ehp.1205296.s001.pdf [file ehp.1205296.s001.pdf]

## **SUPPLEMENTAL MATERIAL**

### **Manuscript title:**

Fetal Growth and Prenatal Exposure to Bisphenol A: The Generation R Study.

### **Authors:**

Claudia A. Snijder, Dick Heederik, Frank H. Pierik, Albert Hofman, Vincent W. Jaddoe, Holger M. Koch, Matthew P. Longnecker, Alex Burdorf.

### **Contents:**

|                                 |        |
|---------------------------------|--------|
| Supplemental Material, Table S1 | Page 2 |
| Supplemental Material, Table S2 | Page 3 |
| Supplemental Material, Table S3 | Page 4 |
| Supplemental Material, Table S4 | Page 5 |

**Supplemental material, Table S1: Characteristics of participants in the BPA fetal growth subset, those with a complete set of pregnancy urine specimens, and the overall Generation R cohort.**

| <b>Maternal characteristics</b> | <b>BPA fetal growth subset (n=219)</b> | <b>Three urine specimens (n=2083)</b> | <b>Generation R Cohort (n=9778)</b> |
|---------------------------------|----------------------------------------|---------------------------------------|-------------------------------------|
| <b>Age at intake (yr)</b>       | 30.8 ± 5.2                             | 29.3 ± 5.0                            | 29.9 ± 5.4                          |
| <b>Educational level</b>        |                                        |                                       |                                     |
| Low                             | 39 (17.8%)                             | 459 (22.0%)                           | 2270 (23.2%)                        |
| Mid-low                         | 56 (25.6%)                             | 591 (28.4%)                           | 2628 (26.9%)                        |
| Mid-high                        | 55 (25.1%)                             | 426 (20.5%)                           | 1655 (16.9%)                        |
| High                            | 50 (22.8%)                             | 488 (23.4%)                           | 2006 (20.5%)                        |
| Missing                         | 19 (8.7%)                              | 119 (5.7%)                            | 1219 (12.5%)                        |
| <b>Ethnicity</b>                |                                        |                                       |                                     |
| Dutch                           | 120 (54.8%)                            | 1009 (48.4%)                          | 4443 (45.4%)                        |
| Surinamese and Dutch Antilleans | 19 (8.7%)                              | 224 (10.8%)                           | 1055 (10.8%)                        |
| Moroccan and Turkish            | 29 (13.2%)                             | 324 (15.6%)                           | 1321 (13.5%)                        |
| Other                           | 34 (15.5%)                             | 443 (21.3%)                           | 1931 (19.7%)                        |
| Missing                         | 17 (7.8%)                              | 83 (4.0%)                             | 1028 (10.5%)                        |
| <b>Parity</b>                   |                                        |                                       |                                     |
| Nulliparous                     | 112 (51.1%)                            | 1198 (57.5%)                          | 5179 (53.0%)                        |
| Multiparous                     | 99 (45.2%)                             | 867 (41.6%)                           | 4213 (43.1%)                        |
| Missing                         | 8 (3.7%)                               | 18 (0.9%)                             | 386 (3.9%)                          |
| <b>Smoking</b>                  |                                        |                                       |                                     |
| Yes, during pregnancy           | 27 (12.3%)                             | 283 (13.6%)                           | 1304 (13.3%)                        |
| Yes, until pregnancy was known  | 10 (4.6%)                              | 171 (8.2%)                            | 634 (6.5%)                          |
| No                              | 158 (72.1%)                            | 1398 (67.1%)                          | 5656 (57.8%)                        |
| Missing                         | 24 (11.0%)                             | 231 (11.1%)                           | 2184 (22.3%)                        |
| <b>Alcohol</b>                  |                                        |                                       |                                     |
| Yes, during pregnancy           | 74 (33.8%)                             | 666 (32.0%)                           | 2786 (28.5%)                        |
| Yes, until pregnancy was known  | 28 (12.8%)                             | 311 (14.9%)                           | 1045 (10.7%)                        |
| No                              | 92 (42.0%)                             | 895 (43.0%)                           | 3808 (38.9%)                        |
| Missing                         | 25 (11.4%)                             | 211 (10.1%)                           | 2139 (21.9%)                        |

Values are means ± standard deviation for normal distributed continuous variables and absolute numbers (percentages) for categorical variables.

**Supplemental material, Table S2: Bisphenol A concentrations in three trimesters of pregnancy among 219 women participating in the Generation R cohort**

| BPA measurements                                               | n (%)       | LOD  | DF (%) | GM  | GSD | Min. | Percentile |      |      |      |      | Max.  |
|----------------------------------------------------------------|-------------|------|--------|-----|-----|------|------------|------|------|------|------|-------|
|                                                                |             |      |        |     |     |      | 5th        | 25th | 50th | 75th | 95th |       |
| N=99 samples analyzed in Erlangen                              |             |      |        |     |     |      |            |      |      |      |      |       |
| Second trimester BPA ( $\mu\text{g/l}$ )                       | 13 (13.1%)  |      |        | 1.3 | 3.5 | <lod | <lod       | 1.0  | 1.3  | 3.8  | 8.0  | 8.0   |
| Third trimester BPA ( $\mu\text{g/l}$ )                        | 86 (86.8%)  |      |        | 1.1 | 3.9 | <lod | <lod       | 0.5  | 1.2  | 2.5  | 9.5  | 46.0  |
| Creatinine based second trimester BPA ( $\mu\text{g/g Crea}$ ) | 13 (13.1%)  |      |        | 1.9 | 2.5 | 0.4  | 0.4        | 1.0  | 1.9  | 4.4  | 8.7  | 8.7   |
| Creatinine based third trimester BPA ( $\mu\text{g/g Crea}$ )  | 86 (86.8%)  |      |        | 1.7 | 2.9 | 0.1  | 0.3        | 0.8  | 1.5  | 3.9  | 8.4  | 22.8  |
| All BPA concentrations ( $\mu\text{g/g Crea}$ )                | 99 (100%)   | 0.26 | 84.6   | 1.7 | 2.8 | 0.1  | 0.3        | 0.8  | 1.7  | 4.0  | 8.6  | 22.8  |
| N=120 samples analyzed in Bochum                               |             |      |        |     |     |      |            |      |      |      |      |       |
| First trimester BPA ( $\mu\text{g/l}$ )                        | 107 (33.4%) |      |        | 1.3 | 3.4 | 0.1  | 0.2        | 0.6  | 1.1  | 3.3  | 10.9 | 24.6  |
| Second trimester BPA ( $\mu\text{g/l}$ )                       | 106 (33.1%) |      |        | 1.7 | 3.2 | 0.2  | 0.3        | 0.7  | 1.7  | 3.1  | 13.8 | 64.8  |
| Third trimester BPA ( $\mu\text{g/l}$ )                        | 107 (33.4%) |      |        | 1.6 | 3.3 | 0.2  | 0.2        | 0.8  | 1.5  | 2.9  | 17.3 | 87.2  |
| Creatinine based first trimester BPA ( $\mu\text{g/g Crea}$ )  | 107 (33.4%) |      |        | 3.1 | 2.1 | 0.7  | 0.9        | 1.9  | 3.0  | 4.9  | 11.6 | 23.2  |
| Creatinine based second trimester BPA ( $\mu\text{g/g Crea}$ ) | 106 (33.1%) |      |        | 3.3 | 2.3 | 0.8  | 1.0        | 1.9  | 2.8  | 4.2  | 23.4 | 40.4  |
| Creatinine based third trimester BPA ( $\mu\text{g/g Crea}$ )  | 107 (33.4%) |      |        | 3.2 | 2.6 | 0.6  | 0.9        | 1.7  | 2.5  | 4.2  | 34.1 | 172.0 |
| All BPA concentrations ( $\mu\text{g/g Crea}$ )                | 320 (100%)  | 0.05 | 100.0  | 3.2 | 2.3 | 0.6  | 1.0        | 1.9  | 2.8  | 4.4  | 14.8 | 172.0 |

LOD: limit of detection, DF: detection frequency, GM=geometric mean, GSD=geometric standard deviation, Min: minimum, Max: maximum.

Values below LOD were assigned values LOD/sqrt(2)

**Supplemental material, Table S3: Overview of the covariates in the repeated linear regression analyses between prenatal exposure to lnBPACB and SD scores of fetal weight and fetal head circumference among 219 pregnant women participating in the Generation R Cohort.**

| Variables                              | Fetal weight<br>Adjusted beta coefficient<br>(95%CI) | Fetal head circumference<br>Adjusted beta coefficient<br>(95%CI) |
|----------------------------------------|------------------------------------------------------|------------------------------------------------------------------|
| <i>Covariates<sup>b</sup></i>          |                                                      |                                                                  |
| Maternal age (per year increase)       | 0.009 (-0.016, 0.034)                                | 0.014 (-0.014, 0.043)                                            |
| Pre-pregnancy weight (per kg increase) | 0.007 (-0.003, 0.017)                                | 0.004 (-0.007, 0.015)                                            |
| Height at intake (per cm increase)     | 0.003 (-0.018, 0.025)                                | 0.007 (-0.016, 0.030)                                            |
| Gender (female)                        | 0.054 (-0.163, 0.270)                                | -0.133 (-0.377, 0.112)                                           |
| Educational level                      |                                                      |                                                                  |
| Low                                    | 0.041 (-0.392, 0.474)                                | -0.407 (-0.875, 0.062)                                           |
| Mid-low                                | -0.115 (-0.438, 0.207)                               | -0.209 (-0.582, 0.165)                                           |
| Mid-high                               | 0.013 (-0.279, 0.305)                                | 0.088 (-0.237, 0.413)                                            |
| High                                   | Reference                                            | Reference                                                        |
| Ethnicity                              |                                                      |                                                                  |
| Dutch                                  | Reference                                            | Reference                                                        |
| Surinamese and Dutch                   | -0.627 (-1.063, -0.190)*                             | -0.178 (-0.645, 0.289)                                           |
| Antilleans                             | -0.002 (-0.452, 0.449)                               | 0.093 (-0.420, 0.605)                                            |
| Moroccan and Turkish                   | -0.171 (-0.499, 0.158)                               | -0.359 (-0.723, 0.004)                                           |
| Other                                  |                                                      |                                                                  |
| Parity                                 | Reference                                            | Reference                                                        |
| Nulliparous                            | 0.311 (0.073, 0.548)*                                | 0.092 (-0.171, 0.354)                                            |
| Multiparous                            |                                                      |                                                                  |
| Smoking                                | Reference                                            | Reference                                                        |
| No                                     | 0.083 (-0.396, 0.562)                                | 0.385 (-0.236, 1.006)                                            |
| Yes, until pregnancy was known         | -0.309 (-0.669, 0.051)                               | -0.021 (-0.433, 0.390)                                           |
| Yes, during pregnancy                  |                                                      |                                                                  |
| Alcohol                                | Reference                                            | Reference                                                        |
| No                                     | 0.197 (-0.147, 0.542)                                | 0.036 (-0.350, 0.422)                                            |
| Yes, until pregnancy was known         | 0.122 (-0.161, 0.406)                                | 0.051 (-0.252, 0.355)                                            |
| Yes, during pregnancy                  |                                                      |                                                                  |
| Folic acid supplement use              |                                                      |                                                                  |
| No                                     | -0.241 (-0.609, 0.127)                               | -0.190 (-0.608, 0.228)                                           |
| Yes, post conception start             | -0.053 (-0.332, 0.227)                               | 0.074 (-0.233, 0.381)                                            |
| Yes, preconception start               | Reference                                            | Reference                                                        |

<sup>b</sup> beta coefficient is the overall effect of this covariate in the model in SD score of fetal weight or fetal head circumference \* P-value <0.05

**Supplemental material, Table S4: Linear regression analyses for repeated measurements on the relation between number of urine samples analyzed for BPA per woman and effects on fetal growth rates during pregnancy.**

| <b>Samples/women</b>                                                 | <b>Number of women</b> | <b>Fetal weight Beta coefficient (95%CI)</b> | <b>Fetal head circumference Beta coefficient (95%CI)</b> |
|----------------------------------------------------------------------|------------------------|----------------------------------------------|----------------------------------------------------------|
| Three samples                                                        | 80                     |                                              |                                                          |
| BPA <sub>CB</sub> (µg/g Crea) < 1.54                                 |                        | Ref                                          | Ref                                                      |
| BPA <sub>CB</sub> (µg/g Crea) 1.54 < BPA <sub>CB</sub> < 2.51        |                        | -0.041 (-0.081, -0.001)*                     | -0.052 (-0.098, -0.006)*                                 |
| BPA <sub>CB</sub> (µg/g Crea) 2.51 < BPA <sub>CB</sub> < 4.22        |                        | -0.043 (-0.082, -0.004)*                     | -0.046 (-0.090, -0.003)*                                 |
| BPA <sub>CB</sub> (µg/g Crea) > 4.22                                 |                        | -0.029 (-0.070, 0.012)                       | -0.066 (-0.113, -0.019)*                                 |
| BPA <sub>CB</sub> (µg/g Crea) Per unit increase in BPA <sub>CB</sub> |                        | -0.017 (-0.033, -0.001)*                     | -0.018 (-0.037, 0.000)+                                  |
| Two samples                                                          | 80                     |                                              |                                                          |
| BPA <sub>CB</sub> (µg/g Crea) < 1.54                                 |                        | Ref                                          | Ref                                                      |
| BPA <sub>CB</sub> (µg/g Crea) 1.54 < BPA <sub>CB</sub> < 2.51        |                        | -0.031 (-0.068, 0.006)                       | -0.044 (-0.085, -0.002)*                                 |
| BPA <sub>CB</sub> (µg/g Crea) 2.51 < BPA <sub>CB</sub> < 4.22        |                        | -0.011 (-0.048, 0.026)                       | -0.035 (-0.076, 0.005)                                   |
| BPA <sub>CB</sub> (µg/g Crea) > 4.22                                 |                        | -0.006 (-0.044, 0.031)                       | -0.065 (-0.111, -0.020)*                                 |
| BPA <sub>CB</sub> (µg/g Crea) Per unit increase in BPA <sub>CB</sub> |                        | -0.016 (-0.036, 0.004)                       | -0.022 (-0.047, 0.004)+                                  |
| One sample                                                           | 80                     |                                              |                                                          |
| BPA <sub>CB</sub> (µg/g Crea) < 1.54                                 |                        | Ref                                          | Ref                                                      |
| BPA <sub>CB</sub> (µg/g Crea) 1.54 < BPA <sub>CB</sub> < 2.51        |                        | -0.007 (-0.057, 0.044)                       | 0.012 (-0.043, 0.068)                                    |
| BPA <sub>CB</sub> (µg/g Crea) 2.51 < BPA <sub>CB</sub> < 4.22        |                        | 0.015 (-0.035, 0.065)                        | 0.015 (-0.045, 0.075)                                    |
| BPA <sub>CB</sub> (µg/g Crea) > 4.22                                 |                        | -0.030 (-0.081, 0.022)                       | 0.022 (-0.040, 0.085)                                    |
| BPA <sub>CB</sub> (µg/g Crea) Per unit increase in BPA <sub>CB</sub> |                        | -0.027 (-0.065, 0.010)                       | 0.005 (-0.035, 0.045)                                    |

BPA<sub>CB</sub> = creatinine based total BPA concentration

\* P-value <0.05, + P-value <0.10

Beta coefficient represents the average decrease in SD of fetal weight per gestational week.

Adjusted for maternal age, educational level, ethnicity, parity, smoking during pregnancy, alcohol use during pregnancy, height at intake, weight before pregnancy, folic acid supplement use, and gender.
